# Supplementary material for: Bacterial Monitoring with Adhesive Sheet in the International Space Station-“Kibo”, the Japanese Experiment Module
Source: PubMed Central journal article supplement (PMC4070660; doi:10.1264/jsme2.me12184), 2013-04-20
Supplement: 28_264_s1.pdf [file 28_264_s1.pdf]

Table S1. Phylogenetic affiliation of DGGE bands originating from bacteria collected from the interior surfaces in the Kibo

| Sample (Accession No.)     | Most closely related species (Accession No.)      | Similarity (%) | Phylogenetic affiliation |                     |                   |                      |                             |
|----------------------------|---------------------------------------------------|----------------|--------------------------|---------------------|-------------------|----------------------|-----------------------------|
|                            |                                                   |                | Phylum                   | Class               | Order             | Family               | Genus                       |
| CBEF_surface-1 (AB720834)  | <i>Escherichia fergusonii</i> (NR_027549)         | 100            | Proteobacteria           | Gammaproteobacteria | Enterobacteriales | Enterobacteriaceae   | <i>Escherichia/Shigella</i> |
|                            | <i>Escherichia albertii</i> (NR_025569)           | 100            | Proteobacteria           | Gammaproteobacteria | Enterobacteriales | Enterobacteriaceae   | <i>Escherichia/Shigella</i> |
|                            | <i>Escherichia coli</i> (NR_024570)               | 100            | Proteobacteria           | Gammaproteobacteria | Enterobacteriales | Enterobacteriaceae   | <i>Escherichia/Shigella</i> |
| CBEF_surface-2 (AB720835)  | <i>Staphylococcus warneri</i> (NR_025922)         | 99             | Firmicutes               | Bacilli             | Bacillales        | Staphylococcaceae    | <i>Staphylococcus</i>       |
|                            | <i>Staphylococcus pasteurii</i> (NR_024669)       | 99             | Firmicutes               | Bacilli             | Bacillales        | Staphylococcaceae    | <i>Staphylococcus</i>       |
| CBEF_surface-3 (AB720836)  | <i>Ralstonia solanacearum</i> (NR_044040)         | 96             | Proteobacteria           | Betaproteobacteria  | Burkholderiales   | Burkholderiaceae     | <i>Ralstonia</i>            |
|                            | <i>Ralstonia pickettii</i> (NR_043152)            | 96             | Proteobacteria           | Betaproteobacteria  | Burkholderiales   | Burkholderiaceae     | <i>Ralstonia</i>            |
|                            | <i>Ralstonia insidiosa</i> (NR_025242)            | 96             | Proteobacteria           | Betaproteobacteria  | Burkholderiales   | Burkholderiaceae     | <i>Ralstonia</i>            |
|                            | <i>Ralstonia syzygii</i> (NR_040803)              | 96             | Proteobacteria           | Betaproteobacteria  | Burkholderiales   | Burkholderiaceae     | <i>Ralstonia</i>            |
| CBEF_surface-4 (AB720837)  | <i>Staphylococcus warneri</i> (NR_025922)         | 99             | Firmicutes               | Bacilli             | Bacillales        | Staphylococcaceae    | <i>Staphylococcus</i>       |
|                            | <i>Staphylococcus pasteurii</i> (NR_024669)       | 99             | Firmicutes               | Bacilli             | Bacillales        | Staphylococcaceae    | <i>Staphylococcus</i>       |
| PC_palm_rest-1 (AB720838)  | <i>Propionibacterium acnes</i> (NR_040847)        | 99             | Actinobacteria           | Actinobacteria      | Actinomycetales   | Propionibacteriaceae | <i>Propionibacterium</i>    |
| PC_palm_rest-2 (AB720839)  | <i>Veillonella parvula</i> (NR_043332)            | 99             | Firmicutes               | Negativicutes       | Selenomonadales   | Veillonellaceae      | <i>Veillonella</i>          |
| PC_palm_rest-3 (AB720840)  | <i>Veillonella parvula</i> (NR_043332)            | 99             | Firmicutes               | Negativicutes       | Selenomonadales   | Veillonellaceae      | <i>Veillonella</i>          |
| PC_palm_rest-4 (AB720841)  | <i>Streptococcus oralis</i> (NR_042927)           | 99             | Firmicutes               | Bacilli             | Lactobacillales   | Streptococcaceae     | <i>Streptococcus</i>        |
|                            | <i>Streptococcus pneumoniae</i> (NR_028665)       | 99             | Firmicutes               | Bacilli             | Lactobacillales   | Streptococcaceae     | <i>Streptococcus</i>        |
| PC_palm_rest-5 (AB720842)  | <i>Streptococcus pseudopneumoniae</i> (NR_027214) | 99             | Firmicutes               | Bacilli             | Lactobacillales   | Streptococcaceae     | <i>Streptococcus</i>        |
| PC_palm_rest-6 (AB720843)  | <i>Streptococcus sanguinis</i> (NR_024841)        | 99             | Firmicutes               | Bacilli             | Lactobacillales   | Streptococcaceae     | <i>Streptococcus</i>        |
| PC_palm_rest-7 (AB720844)  | <i>Megasphaera micronuciformis</i> (NR_025230)    | 99             | Firmicutes               | Negativicutes       | Selenomonadales   | Veillonellaceae      | <i>Megasphaera</i>          |
| PC_palm_rest-8 (AB720845)  | <i>Streptococcus constellatus</i> (NR_042833)     | 93             | Firmicutes               | Bacilli             | Lactobacillales   | Streptococcaceae     | <i>Streptococcus</i>        |
|                            | <i>Streptococcus constellatus</i> (NR_041721)     | 93             | Firmicutes               | Bacilli             | Lactobacillales   | Streptococcaceae     | <i>Streptococcus</i>        |
| PC_palm_rest-9 (AB720846)  | <i>Streptococcus australis</i> (NR_036936)        | 99             | Firmicutes               | Bacilli             | Lactobacillales   | Streptococcaceae     | <i>Streptococcus</i>        |
|                            | <i>Streptococcus oralis</i> (NR_042927)           | 99             | Firmicutes               | Bacilli             | Lactobacillales   | Streptococcaceae     | <i>Streptococcus</i>        |
|                            | <i>Streptococcus pneumoniae</i> (NR_028665)       | 99             | Firmicutes               | Bacilli             | Lactobacillales   | Streptococcaceae     | <i>Streptococcus</i>        |
| PC_palm_rest-10 (AB720847) | <i>Streptococcus phocae</i> (NR_042227)           | 91             | Firmicutes               | Bacilli             | Lactobacillales   | Streptococcaceae     | <i>Streptococcus</i>        |
|                            | <i>Streptococcus pseudoporcinus</i> (NR_043704)   | 91             | Firmicutes               | Bacilli             | Lactobacillales   | Streptococcaceae     | <i>Streptococcus</i>        |
|                            | <i>Streptococcus pseudopneumoniae</i> (NR_027214) | 91             | Firmicutes               | Bacilli             | Lactobacillales   | Streptococcaceae     | <i>Streptococcus</i>        |
|                            | <i>Streptococcus cristatus</i> (NR_042771)        | 91             | Firmicutes               | Bacilli             | Lactobacillales   | Streptococcaceae     | <i>Streptococcus</i>        |
|                            | <i>Streptococcus agalactiae</i> (NR_040821)       | 91             | Firmicutes               | Bacilli             | Lactobacillales   | Streptococcaceae     | <i>Streptococcus</i>        |
| PC_palm_rest-11 (AB720848) | <i>Staphylococcus capitis</i> (NR_027519)         | 93             | Firmicutes               | Bacilli             | Bacillales        | Staphylococcaceae    | <i>Staphylococcus</i>       |
|                            | <i>Staphylococcus capitis</i> (NR_036775)         | 93             | Firmicutes               | Bacilli             | Bacillales        | Staphylococcaceae    | <i>Staphylococcus</i>       |
| PC_palm_rest-12 (AB720849) | <i>Streptococcus pseudopneumoniae</i> (NR_027214) | 99             | Firmicutes               | Bacilli             | Lactobacillales   | Streptococcaceae     | <i>Streptococcus</i>        |
| PC_palm_rest-13 (AB720850) | <i>Aggregatibacter aphrophilus</i> (NR_042876)    | 98             | Proteobacteria           | Gammaproteobacteria | Pasteurellales    | Pasteurellaceae      | <i>Aggregatibacter</i>      |
| return_grill-1 (AB720851)  | <i>Erwinia pyrifoliae</i> (NR_044101)             | 97             | Proteobacteria           | Gammaproteobacteria | Enterobacteriales | Enterobacteriaceae   | <i>Erwinia</i>              |
| return_grill-2 (AB720852)  | <i>Staphylococcus simiae</i> (NR_043146)          | 100            | Firmicutes               | Bacilli             | Bacillales        | Staphylococcaceae    | <i>Staphylococcus</i>       |
| return_grill-3 (AB720853)  | <i>Staphylococcus caprae</i> (NR_024665)          | 100            | Firmicutes               | Bacilli             | Bacillales        | Staphylococcaceae    | <i>Staphylococcus</i>       |
| handrail-1 (AB720854)      | <i>Granulicatella adiacens</i> (NR_025862)        | 99             | Firmicutes               | Bacilli             | Lactobacillales   | Carnobacteriaceae    | <i>Granulicatella</i>       |
|                            | <i>Granulicatella elegans</i> (NR_028682)         | 99             | Firmicutes               | Bacilli             | Lactobacillales   | Carnobacteriaceae    | <i>Granulicatella</i>       |
| handrail-2 (AB720855)      | <i>Propionibacterium acnes</i> (NR_040847)        | 99             | Actinobacteria           | Actinobacteria      | Actinomycetales   | Propionibacteriaceae | <i>Propionibacterium</i>    |
| handrail-3 (AB720856)      | <i>Propionibacterium acnes</i> (NR_040847)        | 99             | Actinobacteria           | Actinobacteria      | Actinomycetales   | Propionibacteriaceae | <i>Propionibacterium</i>    |
| handrail-4 (AB720857)      | <i>Propionibacterium acnes</i> (NR_040847)        | 93             | Actinobacteria           | Actinobacteria      | Actinomycetales   | Propionibacteriaceae | <i>Propionibacterium</i>    |
| handrail-5 (AB720858)      | <i>Rothia mucilaginosa</i> (NR_044873)            | 99             | Actinobacteria           | Actinobacteria      | Actinomycetales   | Micrococcaceae       | <i>Rothia</i>               |
| handrail-6 (AB720859)      | <i>Tsukamurella inchonensis</i> (NR_041804)       | 96             | Actinobacteria           | Actinobacteria      | Actinomycetales   | Tsukamurellaceae     | <i>Tsukamurella</i>         |
|                            | <i>Tsukamurella spumae</i> (NR_044951)            | 96             | Actinobacteria           | Actinobacteria      | Actinomycetales   | Tsukamurellaceae     | <i>Tsukamurella</i>         |
| handrail-7 (AB720860)      | <i>Propionibacterium acnes</i> (NR_040847)        | 99             | Actinobacteria           | Actinobacteria      | Actinomycetales   | Propionibacteriaceae | <i>Propionibacterium</i>    |
| handrail-8 (AB720861)      | <i>Propionibacterium acnes</i> (NR_040847)        | 99             | Actinobacteria           | Actinobacteria      | Actinomycetales   | Propionibacteriaceae | <i>Propionibacterium</i>    |
| handrail-9 (AB720862)      | <i>Rothia mucilaginosa</i> (NR_044873)            | 99             | Actinobacteria           | Actinobacteria      | Actinomycetales   | Micrococcaceae       | <i>Rothia</i>               |
| handrail-10 (AB720863)     | <i>Rothia mucilaginosa</i> (NR_044873)            | 100            | Actinobacteria           | Actinobacteria      | Actinomycetales   | Micrococcaceae       | <i>Rothia</i>               |
| handrail-11 (AB720864)     | <i>Propionibacterium acnes</i> (NR_040847)        | 100            | Actinobacteria           | Actinobacteria      | Actinomycetales   | Propionibacteriaceae | <i>Propionibacterium</i>    |
| handrail-12 (AB720865)     | <i>Neisseria subflava</i> (NR_041989)             | 99             | Proteobacteria           | Betaproteobacteria  | Neisseriales      | Neisseriaceae        | <i>Neisseria</i>            |
| handrail-13 (AB720866)     | <i>Neisseria subflava</i> (NR_041989)             | 99             | Proteobacteria           | Betaproteobacteria  | Neisseriales      | Neisseriaceae        | <i>Neisseria</i>            |
| handrail-14 (AB720867)     | <i>Escherichia fergusonii</i> (NR_027549)         | 100            | Proteobacteria           | Gammaproteobacteria | Enterobacteriales | Enterobacteriaceae   | <i>Escherichia/Shigella</i> |
|                            | <i>Escherichia albertii</i> (NR_025569)           | 100            | Proteobacteria           | Gammaproteobacteria | Enterobacteriales | Enterobacteriaceae   | <i>Escherichia/Shigella</i> |
|                            | <i>Escherichia coli</i> (NR_024570)               | 100            | Proteobacteria           | Gammaproteobacteria | Enterobacteriales | Enterobacteriaceae   | <i>Escherichia/Shigella</i> |
| handrail-15 (AB720868)     | <i>Bacillus nealsonii</i> (NR_044546)             | 99             | Firmicutes               | Bacilli             | Bacillales        | Bacillaceae          | <i>Bacillus</i>             |
| handrail-16 (AB720869)     | <i>Bacillus nealsonii</i> (NR_044546)             | 95             | Firmicutes               | Bacilli             | Bacillales        | Bacillaceae          | <i>Bacillus</i>             |
|                            | <i>Bacillus soli</i> (NR_025591)                  | 95             | Firmicutes               | Bacilli             | Bacillales        | Bacillaceae          | <i>Bacillus</i>             |
|                            | <i>Bacillus bataviensis</i> (NR_036766)           | 95             | Firmicutes               | Bacilli             | Bacillales        | Bacillaceae          | <i>Bacillus</i>             |
|                            | <i>Bacillus nealsonii</i> (NR_044546)             | 98             | Firmicutes               | Bacilli             | Bacillales        | Bacillaceae          | <i>Bacillus</i>             |
| handrail-17 (AB720870)     | <i>Bacillus nealsonii</i> (NR_044546)             | 98             | Firmicutes               | Bacilli             | Bacillales        | Bacillaceae          | <i>Bacillus</i>             |
| handrail-18 (AB720871)     | <i>Bacillus pseudocaliphilus</i> (NR_026145)      | 98             | Firmicutes               | Bacilli             | Bacillales        | Bacillaceae          | <i>Bacillus</i>             |
